# Supplementary material
Source: ML conference proceedings conference paper supplement (https://openreview.net/forum?id=_67HnXYixmN)

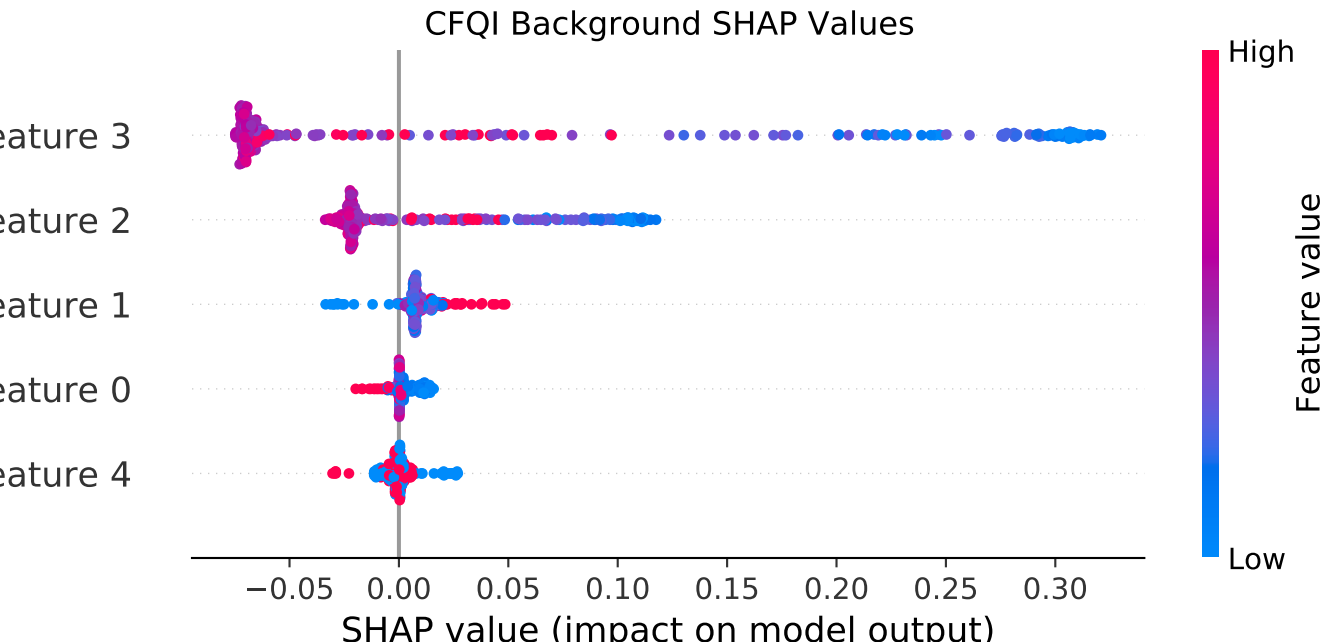

Supplement: supplementary_material [file attachment]

# Performance with imbalanced datasets

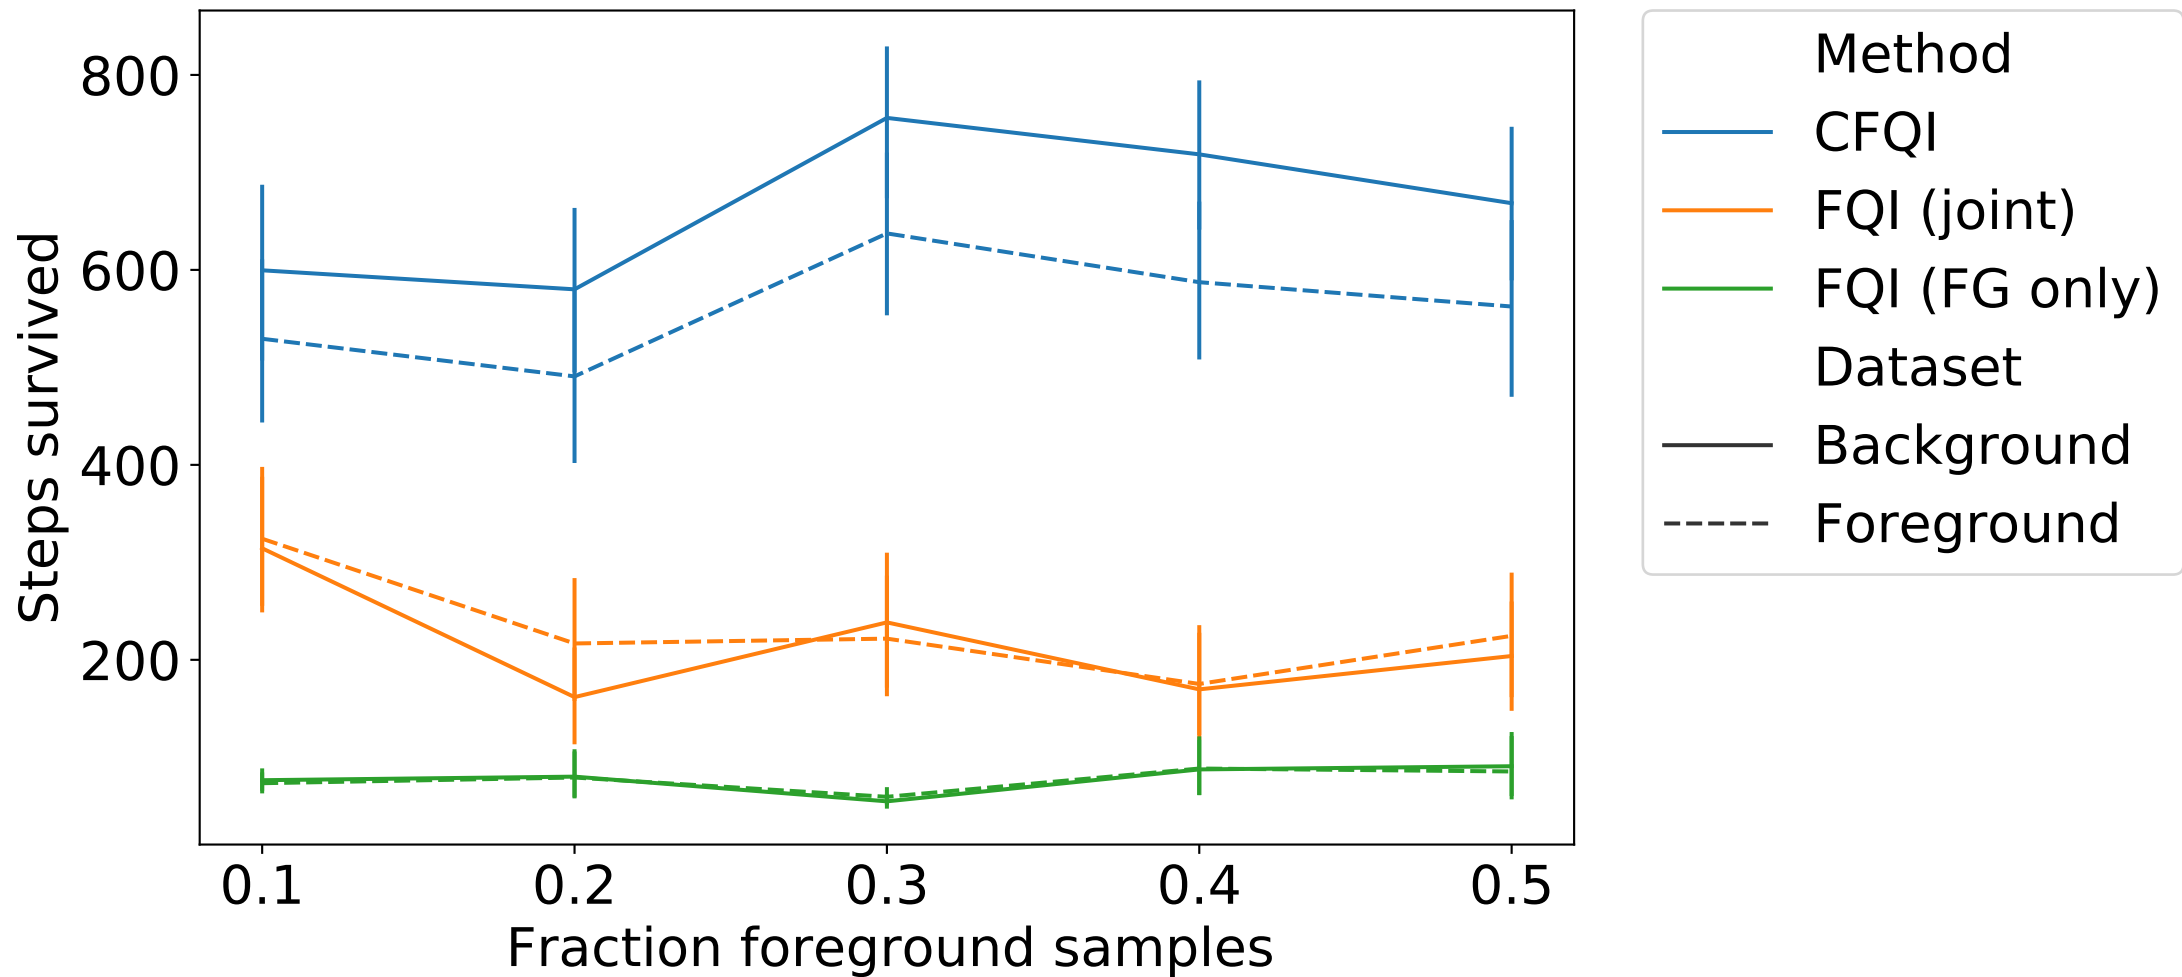

Supplement: supplementary_material [file attachment]

Group 0 SHAP values

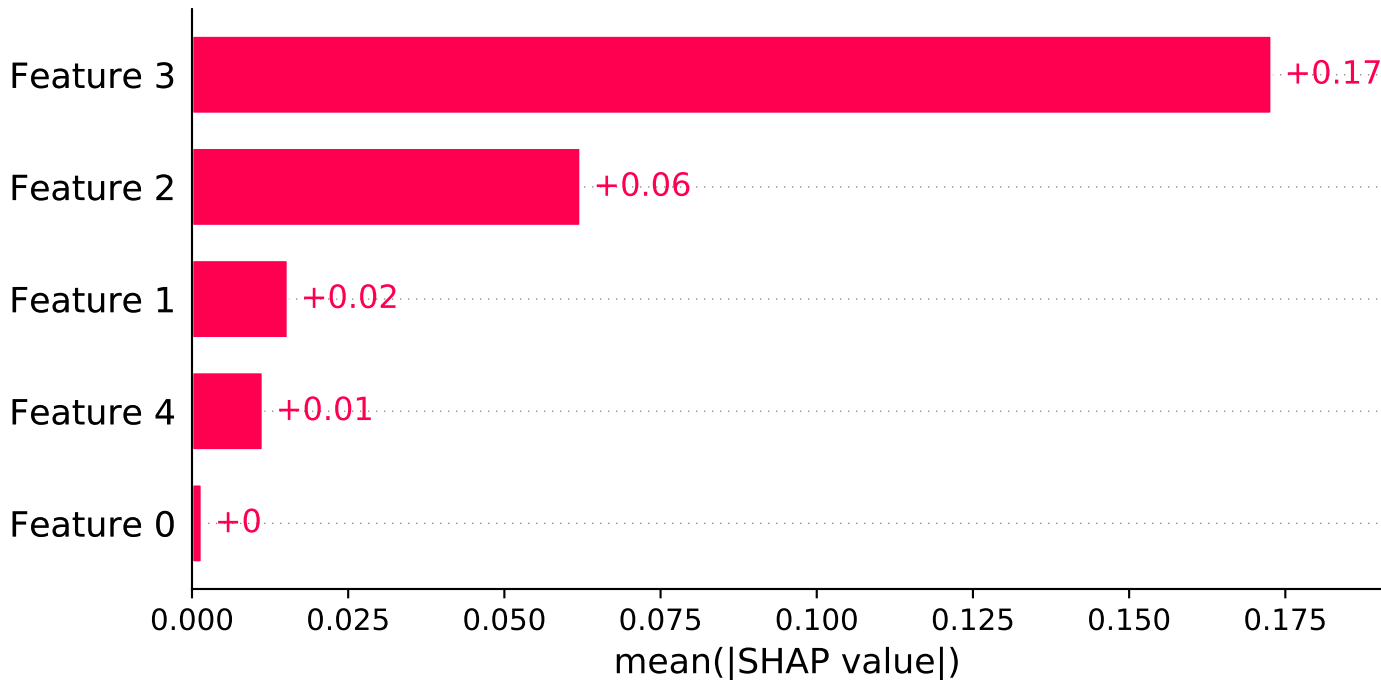

Supplement: supplementary_material [file attachment]

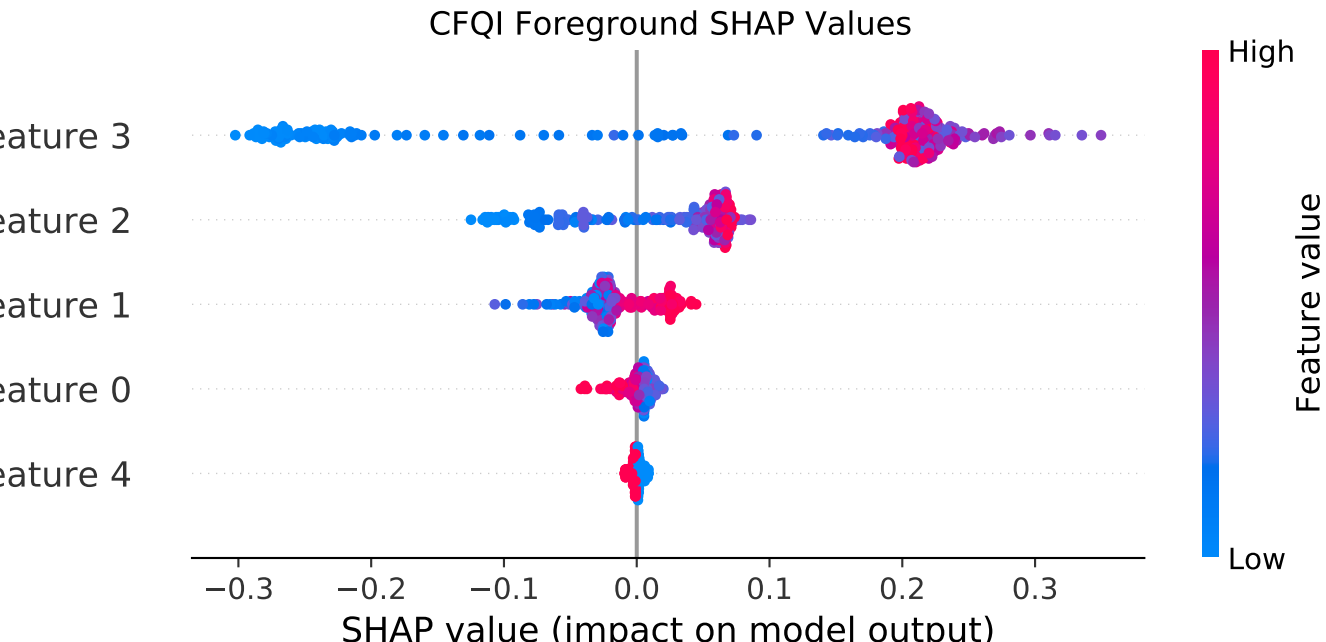

Supplement: supplementary_material [file attachment]

SHAP Values for Shuffle Test

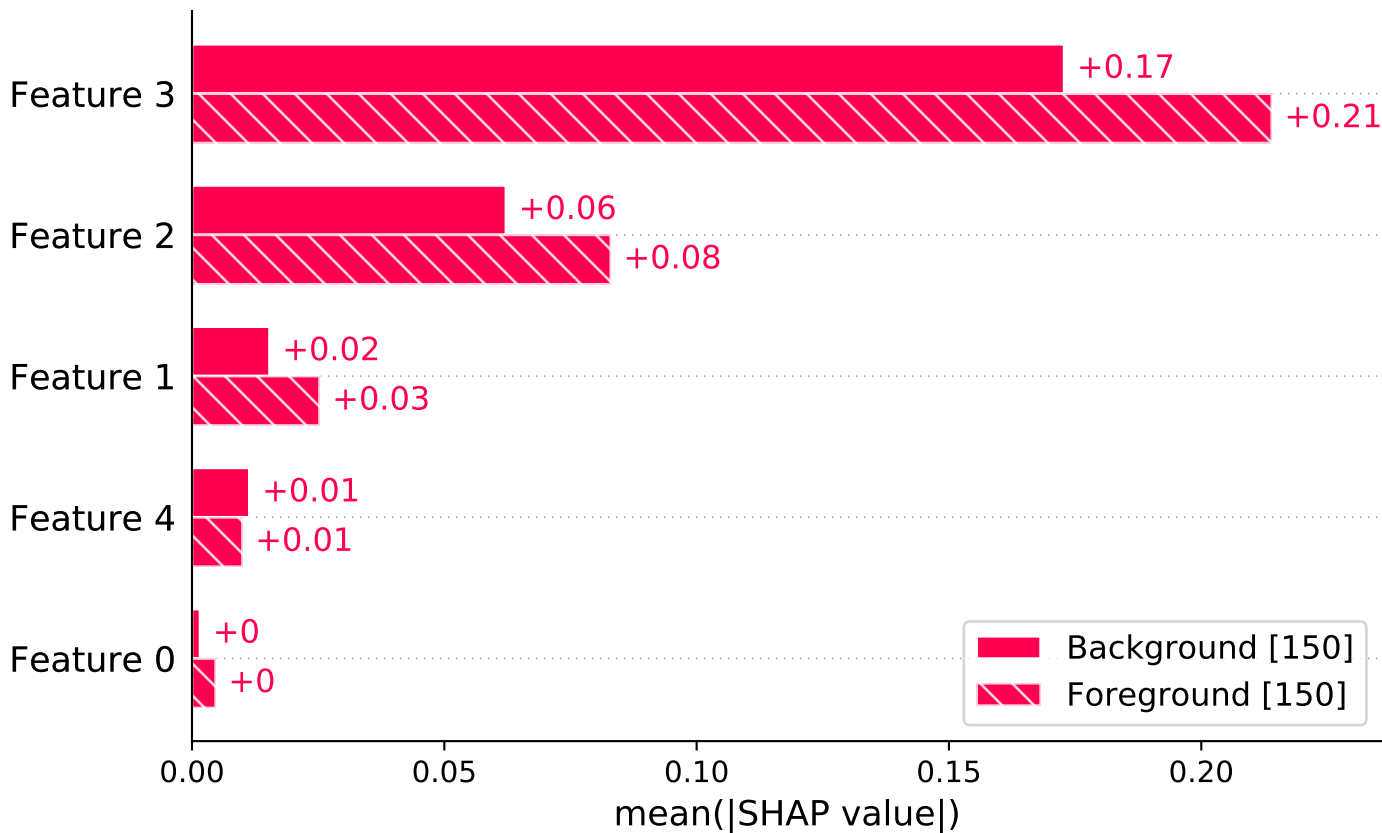

Supplement: supplementary_material [file attachment]

CFQI Shap Values

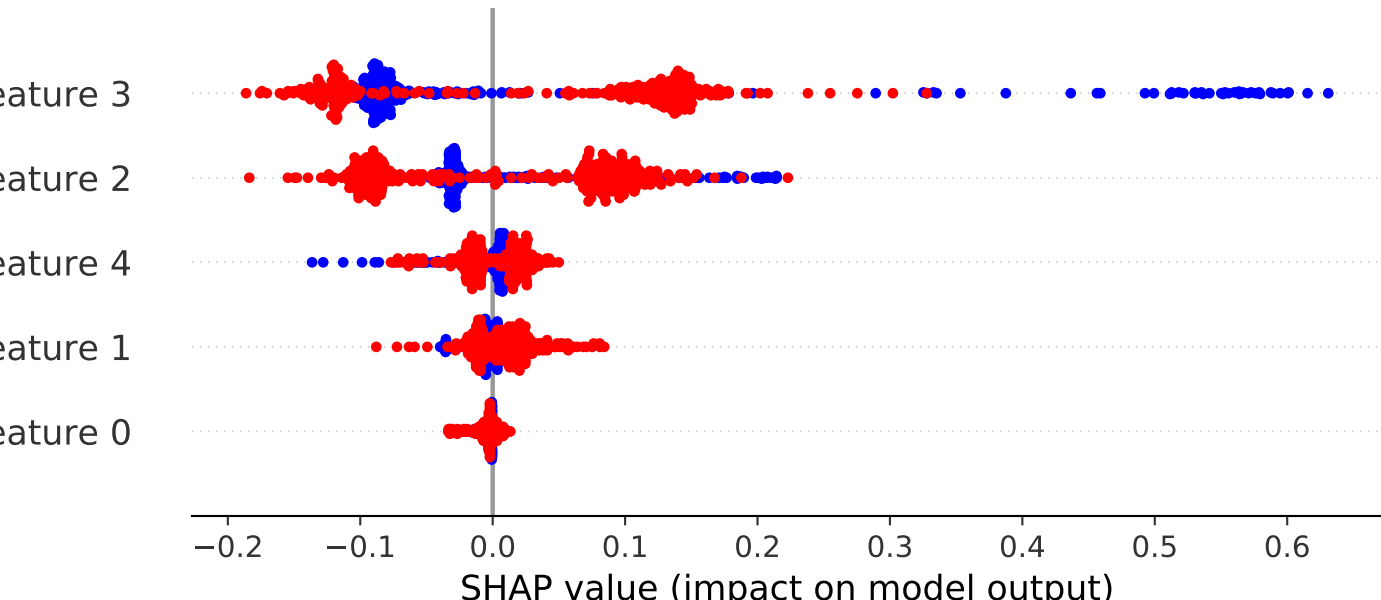

Supplement: supplementary_material [file attachment]

Group 1 SHAP values

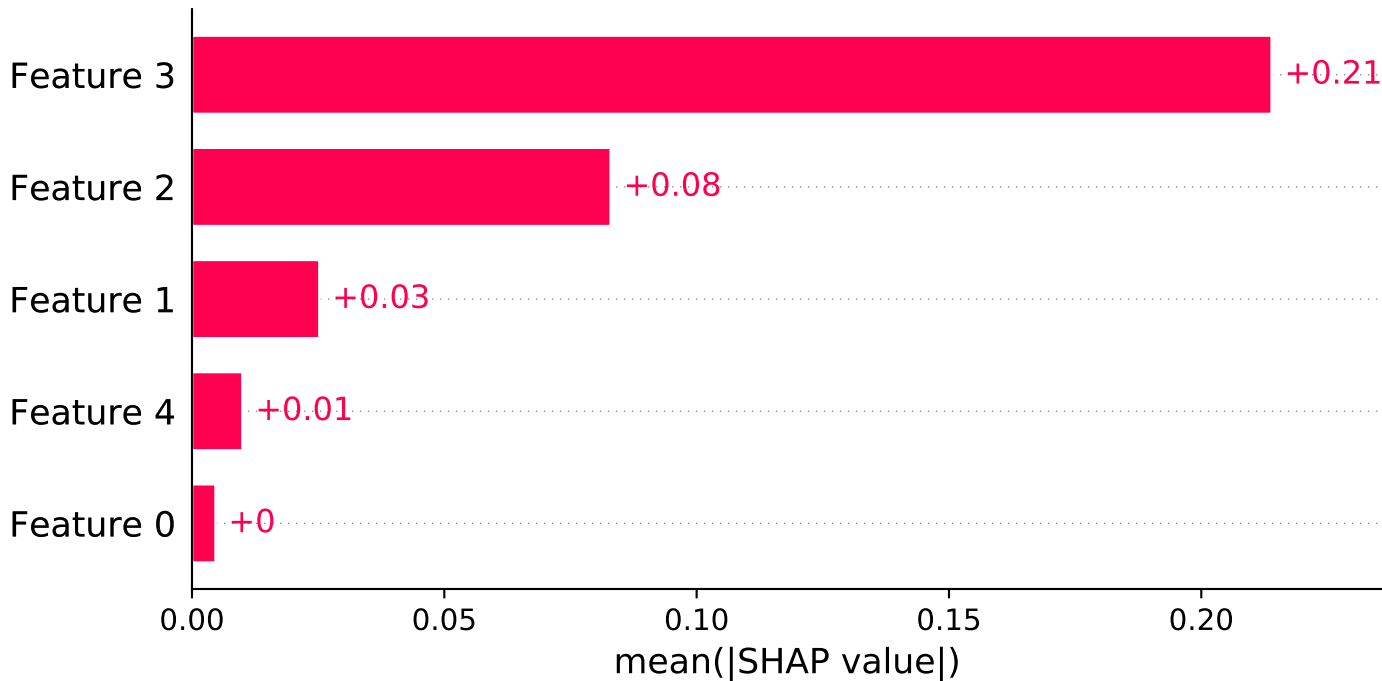

Supplement: supplementary_material [file attachment]
